# Supplementary material for: Evaluation of snow cover properties in ERA5 and ERA5-Land with several satellite-based datasets in the Northern Hemisphere in spring 1982–2018
Source: Copernicus journal article supplement (doi:10.5194/tc-2023-53), 2023-04-21
Supplement: Supplementary file 1 [file tc-2023-53-supplement.pdf]

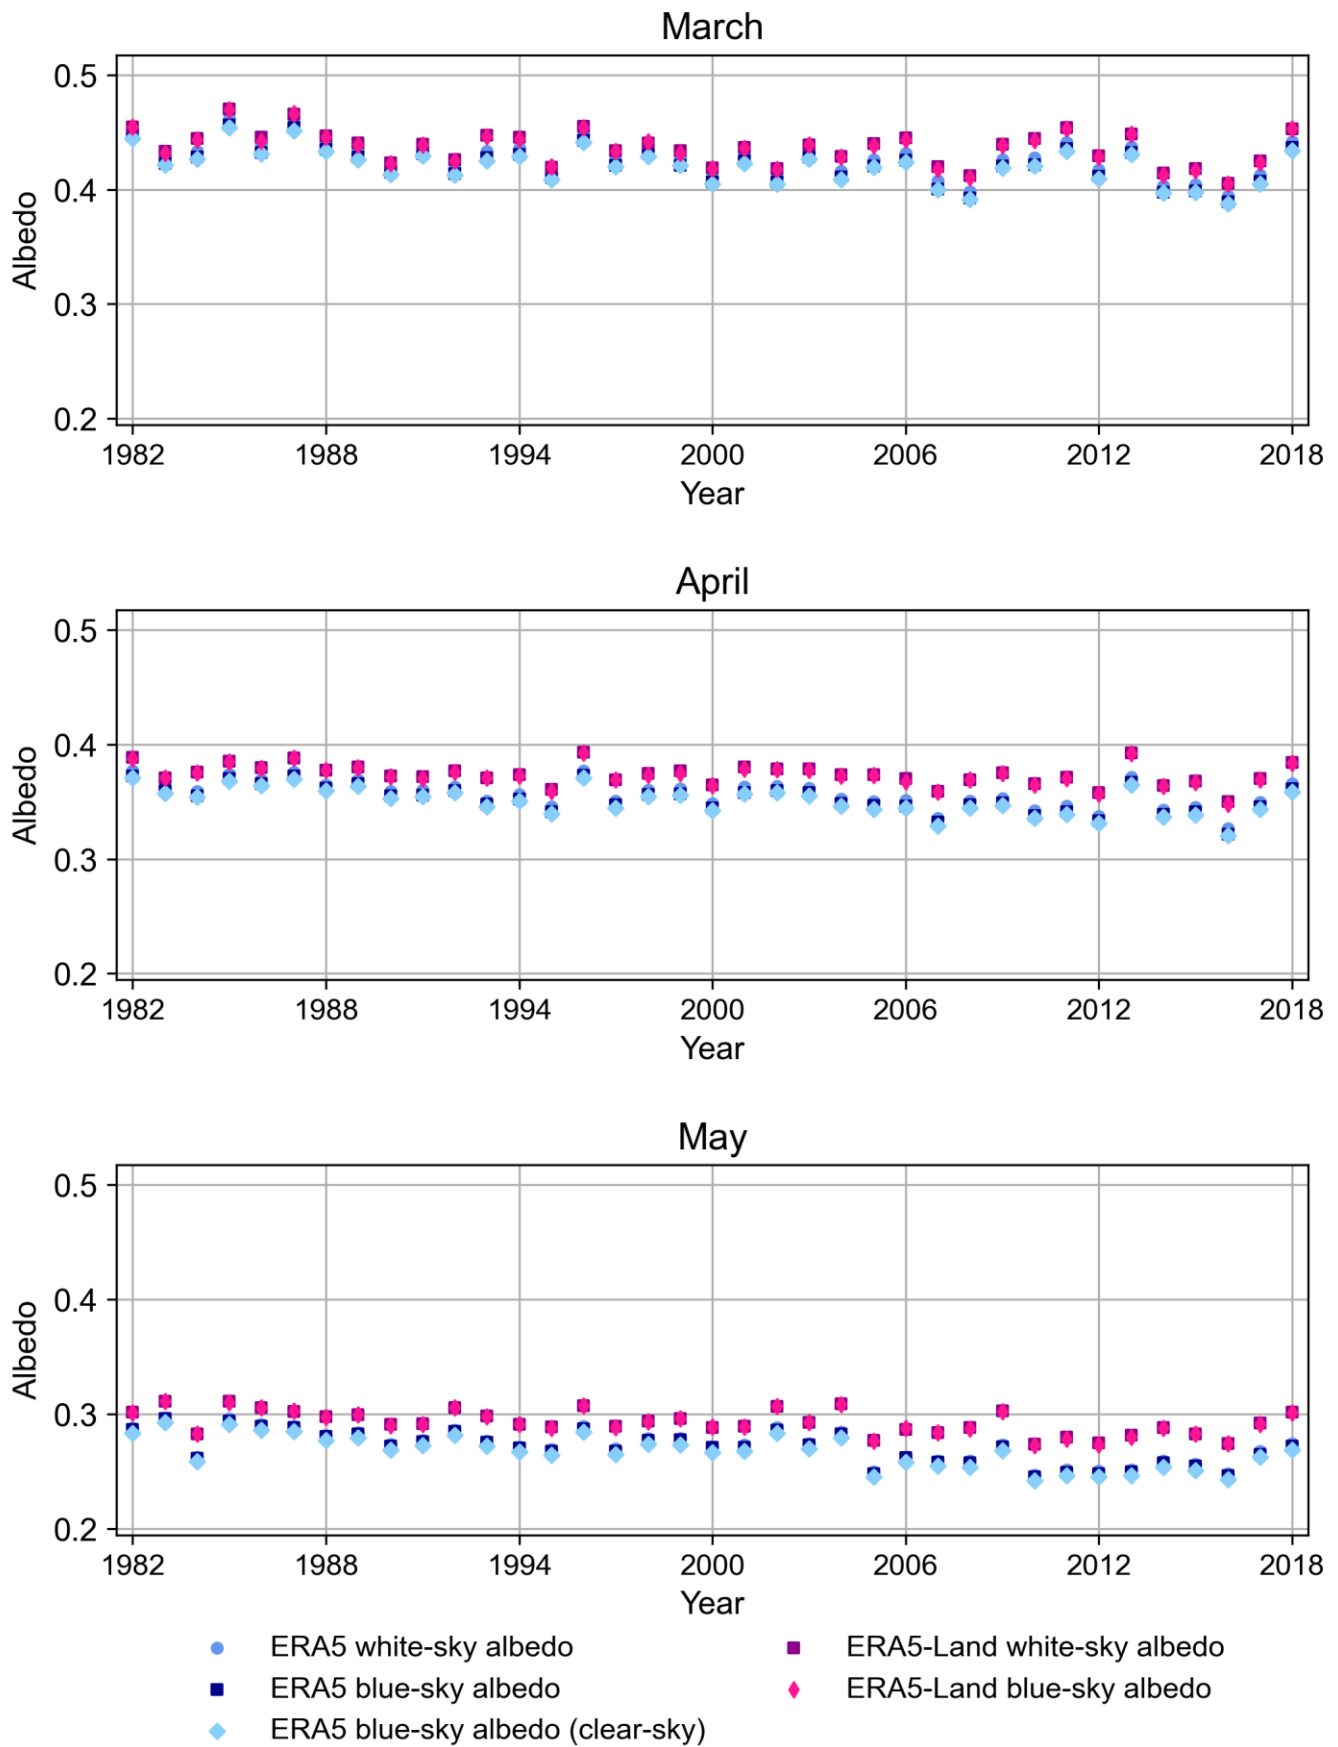

Figure S1. Timeseries of albedo.

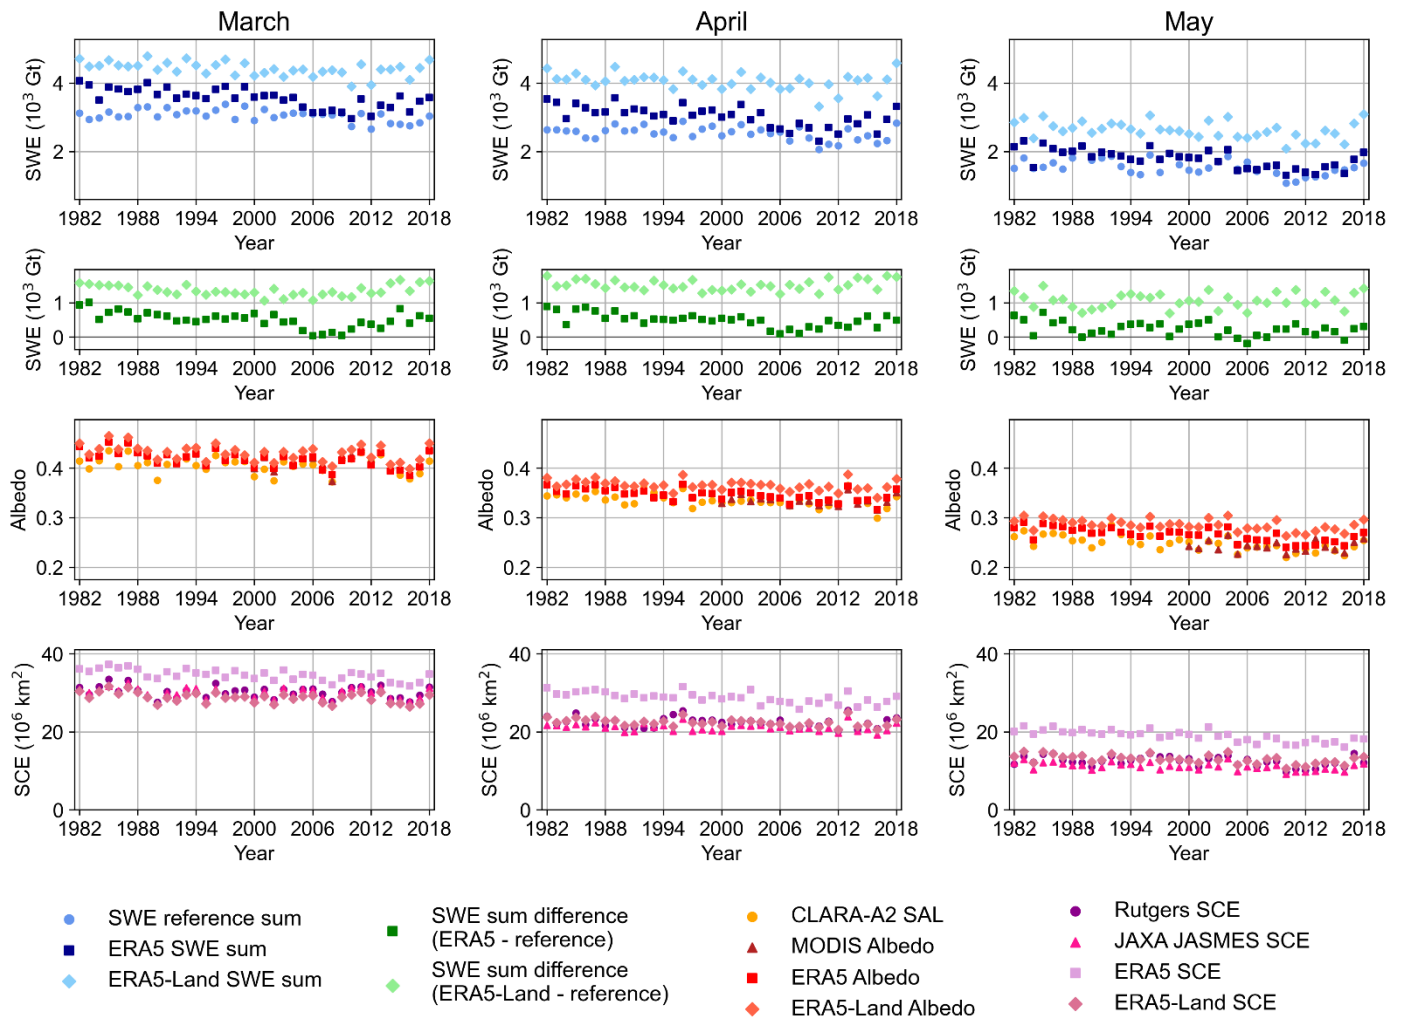

**Figure S2. Timeseries of the non-mountainous regions in (left) March, (middle) April and (right) May for SWE sum (top row), difference in SWE sum (second row), albedo (third row) and SCE (bottom row).**

Trends in April 1982-2018

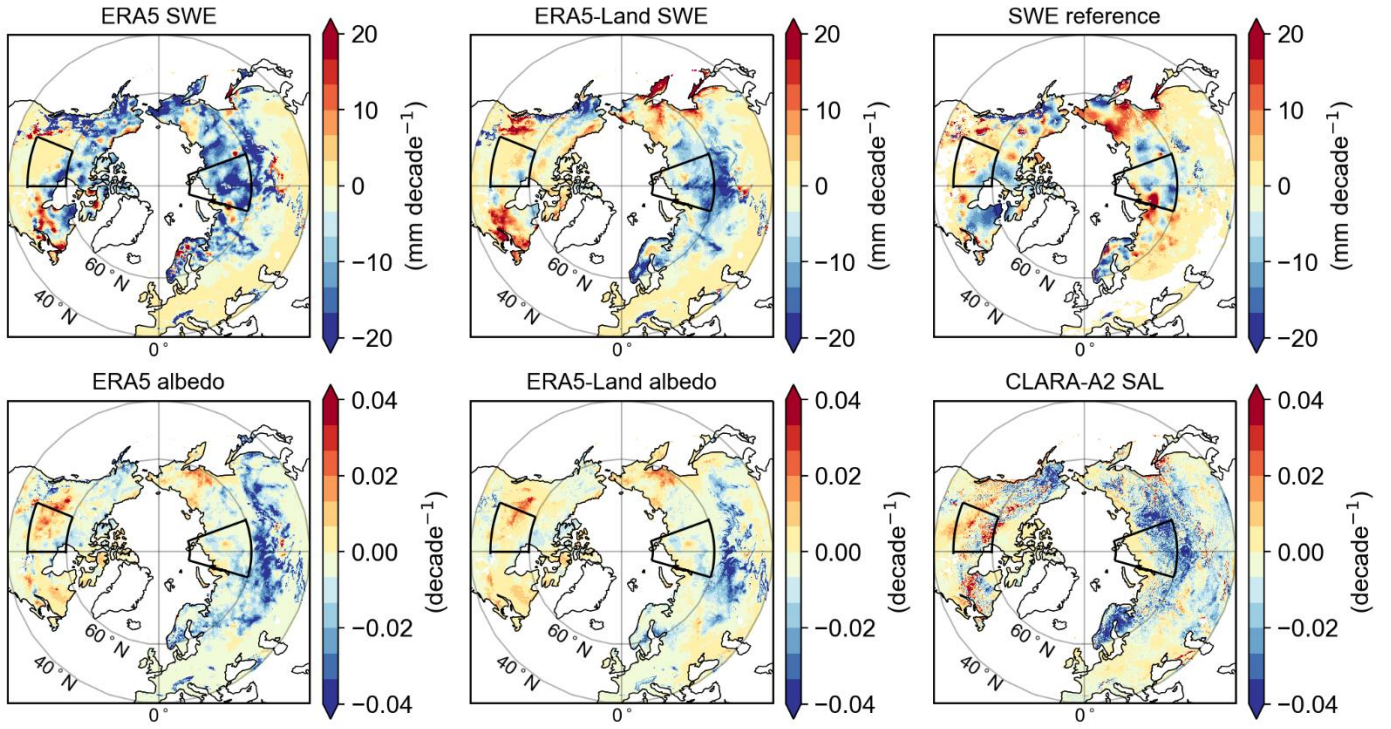

Figure S3. (top row) SWE trends in April 1982-2018. (bottom row) Albedo trends in April 1982-2018.

Trends in May 1982-2018

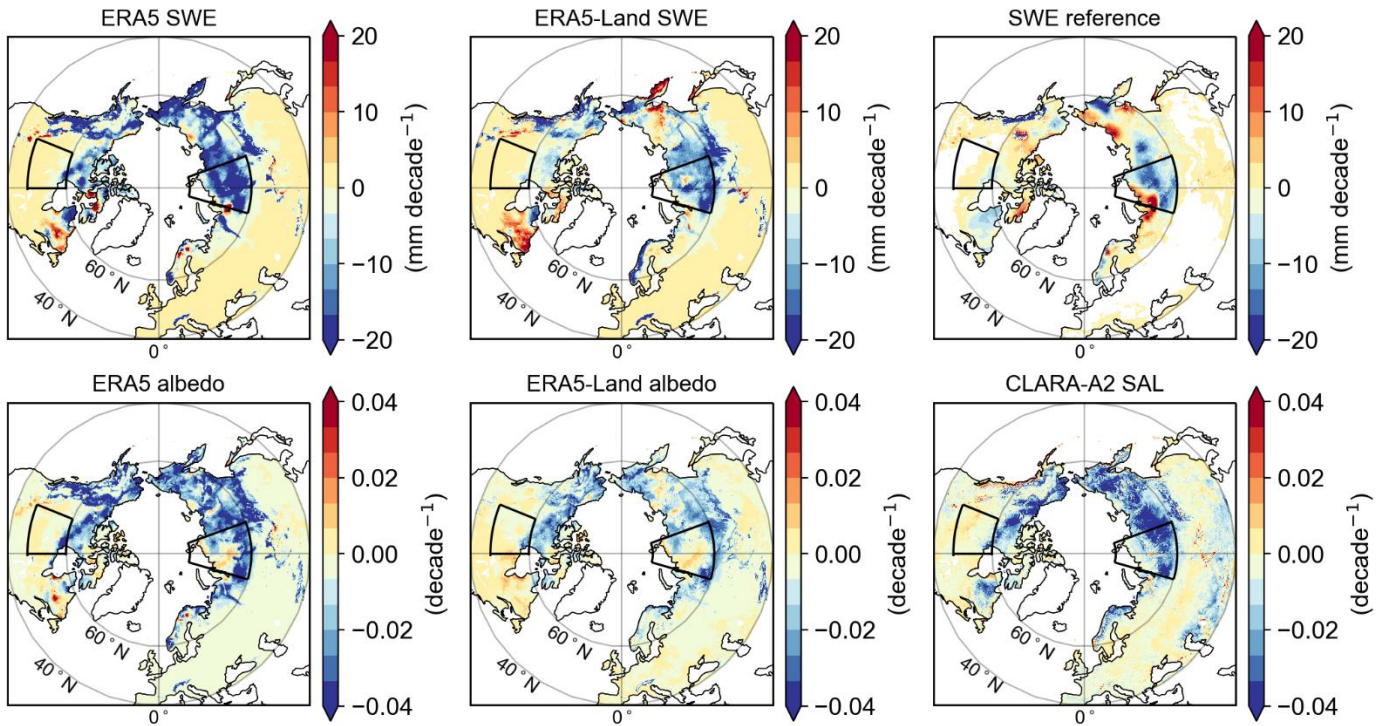

Figure S4. (top row) SWE trends in May 1982-2018. (bottom row) Albedo trends in May 1982-2018.



Trends in April 2000-2018

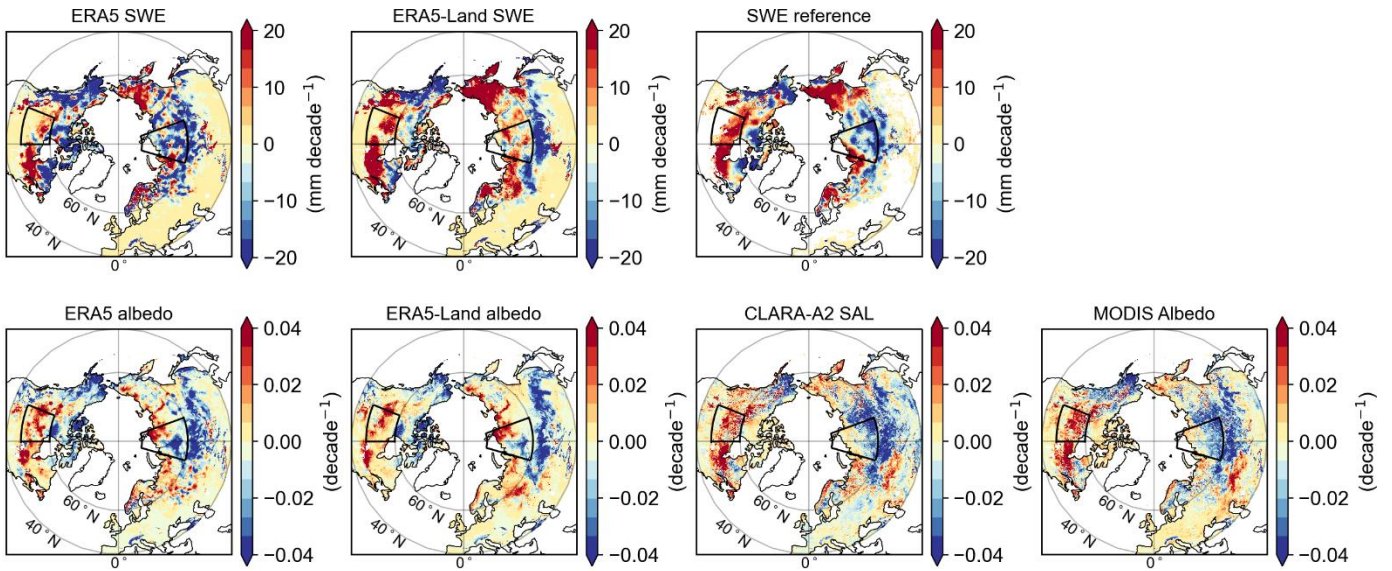

Figure S5. (top row) SWE trends in April 2000-2018. (bottom row) Albedo trends in April 2000-2018.

Trends in May 2000-2018

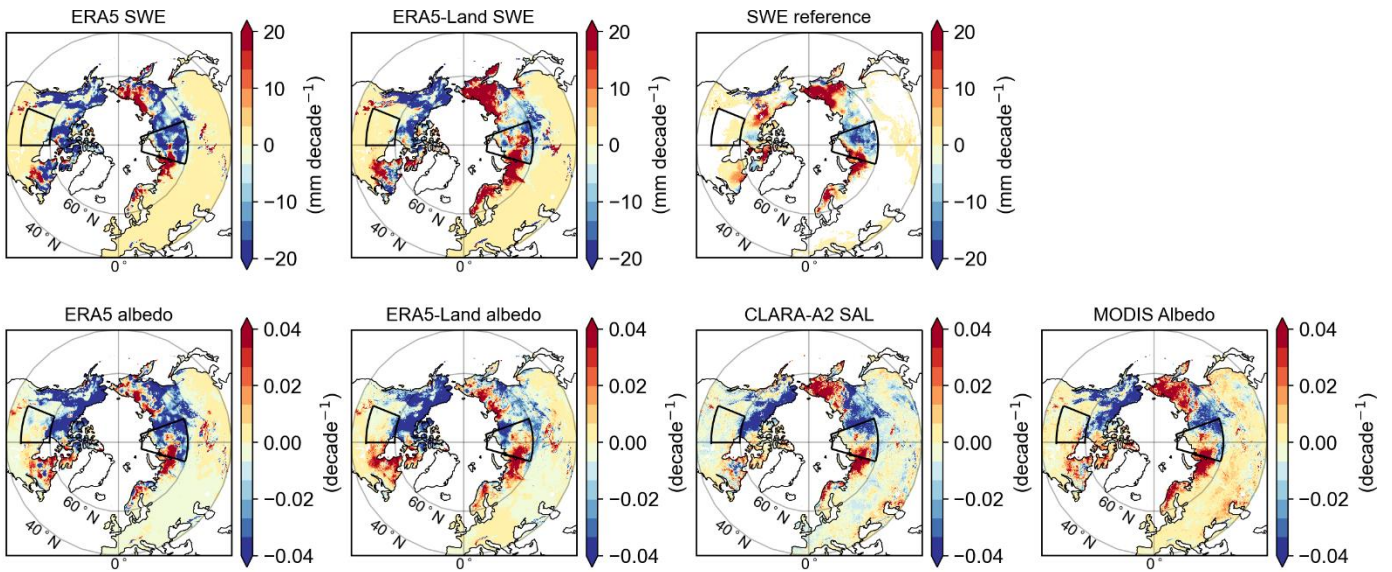

Figure S6. (top row) SWE trends in April 2000-2018. (bottom row) Albedo trends in April 2000-2018.

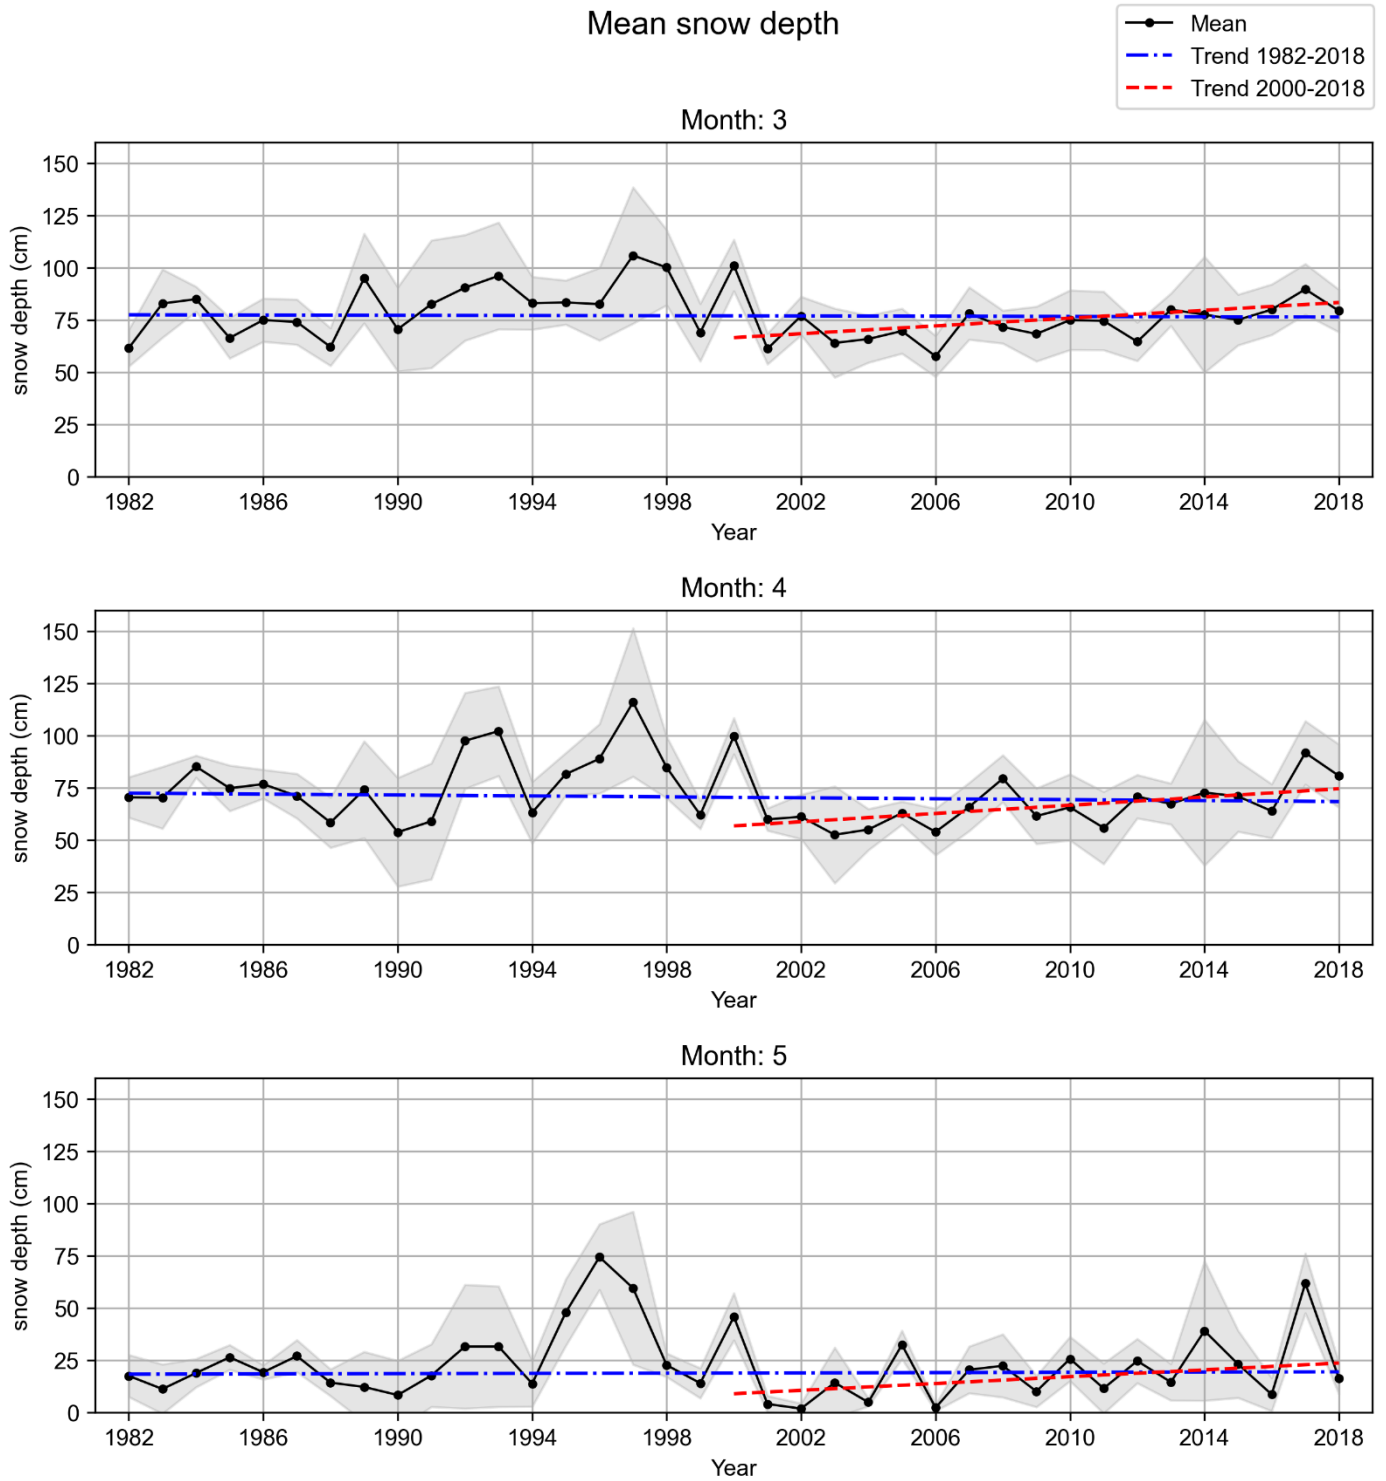

**Figure S7. Timeseries of mean in situ snow depth across Lapland. The shaded area is  $\pm\sigma$  from the mean value.  $\sigma$  = standard deviation.**
